# Supplementary material for: Population Pharmacokinetic and Concentration-QTc Analysis of Delamanid in Pediatric Participants with Multidrug-Resistant Tuberculosis
Source: PubMed Central journal article supplement (PMC8846319; doi:10.1128/aac.01608-21), 2022-02-15
Supplement: aac.01608-21-s0001.pdf [file aac.01608-21-s0001.pdf]

1  
2  
3  
4

**Supplementary Information for  
Population Pharmacokinetic and Concentration-QTc Analysis of Delamanid  
in Pediatric Participants with Multidrug-Resistant Tuberculosis**

## Supplemental Tables

6 **Table S1. Dosing Regimens and Pharmacokinetic/Pharmacodynamic Sampling Plans**

| Trial Number/<br>Phase | Dosing Regimen                                                                                                                                                                                                                                                                                                                                                                                                                                                                                                                                                                                                                    | Pharmacokinetic Sampling                                                                                                                                                                                                                                                                                                                            | Pharmacodynamic (QTc) Sampling                                                                                                                                                                                                                                                                                                                                      |
|------------------------|-----------------------------------------------------------------------------------------------------------------------------------------------------------------------------------------------------------------------------------------------------------------------------------------------------------------------------------------------------------------------------------------------------------------------------------------------------------------------------------------------------------------------------------------------------------------------------------------------------------------------------------|-----------------------------------------------------------------------------------------------------------------------------------------------------------------------------------------------------------------------------------------------------------------------------------------------------------------------------------------------------|---------------------------------------------------------------------------------------------------------------------------------------------------------------------------------------------------------------------------------------------------------------------------------------------------------------------------------------------------------------------|
| 232/<br>Phase 1        | Delamanid 50 mg oral tablet or 25 mg/5 mg dispersible tablet <sup>c</sup> for 10 days <ul style="list-style-type: none"> <li>• Group 1 (ages 12 - 17 years): 100 mg BID + OBR, adult formulation tablet</li> <li>• Group 2 (ages 6 - 11 years): 50 mg BID + OBR, adult formulation tablet</li> <li>• Group 3 (ages 3 - 5 years): 25 mg BID + OBR, dispersible tablet</li> <li>• Group 4 (ages birth - 2 years): dispersible tablet               <ul style="list-style-type: none"> <li>➤ 10 kg: 10 mg BID + OBR</li> <li>➤ 8 kg and ≤ 10 kg: 5 mg BID + OBR</li> <li>➤ ≥ 5.5 kg and ≤ 8 kg: 5 mg QD + OBR</li> </ul> </li> </ul> | <ul style="list-style-type: none"> <li>• Days 1 to 2 and 10 to 11:               <ul style="list-style-type: none"> <li>➤ Predose and 2, 4, 10, 12<sup>a</sup>, 14, and 24 hours postdose</li> </ul> </li> <li>• Days 13<sup>a</sup>, 15, and 18 (72, 120, and 192 hours, respectively, postdose on Day 10)</li> <li>• Early Termination</li> </ul> | <ul style="list-style-type: none"> <li>• Day -1: Time of day that corresponds to the predose, 4-hour, and 10-hour post morning dose administration on Day 1</li> <li>• Days 1 and 10: Predose, 4-hour, and 10-hour post morning dose administration</li> <li>• Day 18: 192-hour post dose</li> <li>• Early Termination: Time paired with PK blood sample</li> </ul> |
| 233/<br>Phase 2        | Delamanid 50 mg oral tablet or 25 mg/5 mg dispersible tablet <sup>c</sup> for 6 months<br><br>Dosing regimen is same as 242-12-232                                                                                                                                                                                                                                                                                                                                                                                                                                                                                                | <ul style="list-style-type: none"> <li>• Predose on Days 1, 56, 154, and 182</li> <li>• Theoretical predose on Day 210<sup>b</sup> (Sampling timing is same as other predose samples, but no delamanid dose is planned)</li> <li>• Any time point on Days 14, 98, 189, 196, 203, and 238<sup>b</sup></li> <li>• Early Termination</li> </ul>        | <ul style="list-style-type: none"> <li>• Day -1</li> <li>• Predose on Days 28, 84, and 126</li> <li>• Days 1, 56, 154, and 182: Predose, time paired with PK blood sample</li> <li>• Day 210: Theoretical predose, time paired with PK blood sample</li> <li>• Early Termination</li> </ul>                                                                         |

7 <sup>a</sup> The samples at 12 hours postdose and Day 13 are only available for Groups 1 and 2. <sup>b</sup> Last dose of delamanid on Day 182.

8 <sup>c</sup> 25 mg and 5 mg dispersible tablet are delamanid pediatric formulations. QD=Once a day. BID=Twice a day.

10 **Table S2. Combination of Scenario Tested in Structural Model Development**

| Compartmental Model | Absorption Order                   | Lag Time for Absorption | Residual Error Model                                  |
|---------------------|------------------------------------|-------------------------|-------------------------------------------------------|
| One<br>Two<br>Three | Transit compartment<br>First-order | Yes<br>No               | Additive<br>Proportional<br>Additive and Proportional |

11

12 **Table S3. Planned Evaluation of Covariate in Analyses**

| Covariate                               | Pharmacokinetic Parameters |                        |           |
|-----------------------------------------|----------------------------|------------------------|-----------|
|                                         | Absorption Rate/Extent     | Volume of Distribution | Clearance |
| Dose                                    | X                          |                        |           |
| Formulation                             | X                          |                        |           |
| Dose timing                             | X                          |                        |           |
| Age Group number                        | X                          |                        |           |
| Age                                     | X                          | X                      | X         |
| Body weight                             |                            | X                      | X         |
| Body surface area                       |                            | X                      | X         |
| BMI                                     | X                          | X                      | X         |
| Sex                                     | X                          | X                      | X         |
| Race                                    | X                          | X                      | X         |
| Country                                 | X                          | X                      | X         |
| Clinical laboratory values <sup>a</sup> | X <sup>b</sup>             | X <sup>b</sup>         | X         |

13 <sup>a</sup> Clinical laboratory values include estimated glomerular filtration rate using Schwartz equation, albumin, alanine  
 14 aminotransferase, aspartate aminotransferase, total bilirubin, alkaline phosphatase, and total protein.

15 <sup>b</sup> only albumin was tested.

16

17 **Table S4. Parameter Estimates of the Linear Mixed Effects Model for Delamanid/ $\Delta$ QTcB**

| Parameter                                               | Estimate  | SE      | 90% CI           |
|---------------------------------------------------------|-----------|---------|------------------|
| <b>Fixed Effects</b>                                    |           |         |                  |
| $\theta_0$ , Intercept (ms)                             | 1.47      | 1.67    | -1.80, 4.75      |
| $\theta_1$ , Slope (ms/[ng/mL])                         | 0.00792   | 0.00471 | -0.00132, 0.0172 |
| $\theta_2$ , Baseline QTcB effect                       | 0.0318    | 0.0739  | -0.113, 0.177    |
| <b>Inter-Individual Variability (shown as variance)</b> |           |         |                  |
| $\eta_0$ , Random effect for the intercept              | 63.5      | NE      |                  |
| $\eta_1$ , Random effect for the slope                  | 0.0000937 | NE      |                  |
| <b>Residual Variability (shown as variance)</b>         | 180       | NE      |                  |

18 NE: not estimated

19

20 **Table S5. Parameter Estimates of the Linear Mixed Effects Model for DM-6705/ $\Delta$ QTcB**

| Parameter                                               | Estimate | SE     | 90% CI        |
|---------------------------------------------------------|----------|--------|---------------|
| <b>Fixed Effects</b>                                    |          |        |               |
| $\theta_0$ , Intercept (ms)                             | 0.923    | 1.61   | -2.22, 4.07   |
| $\theta_1$ , Slope (ms/[ng/mL])                         | 0.0613   | 0.0231 | 0.016, 0.107  |
| $\theta_2$ , Baseline QTcB effect                       | 0.0309   | 0.0728 | -0.112, 0.174 |
| <b>Inter-Individual Variability (shown as variance)</b> |          |        |               |
| $\eta_0$ , Random effect for the intercept              | 59.9     | NE     |               |
| $\eta_1$ , Random effect for the slope                  | 0.00446  | NE     |               |
| <b>Residual Variability (shown as variance)</b>         | 174      | NE     |               |

21 NE: not estimated

22

24

25

### Supplemental Figures

26 **Figure S1. Impact by Removing Individuals on Significance of Covariates (Upper:**  
27 **Albumin, Lower: Sex)**

28

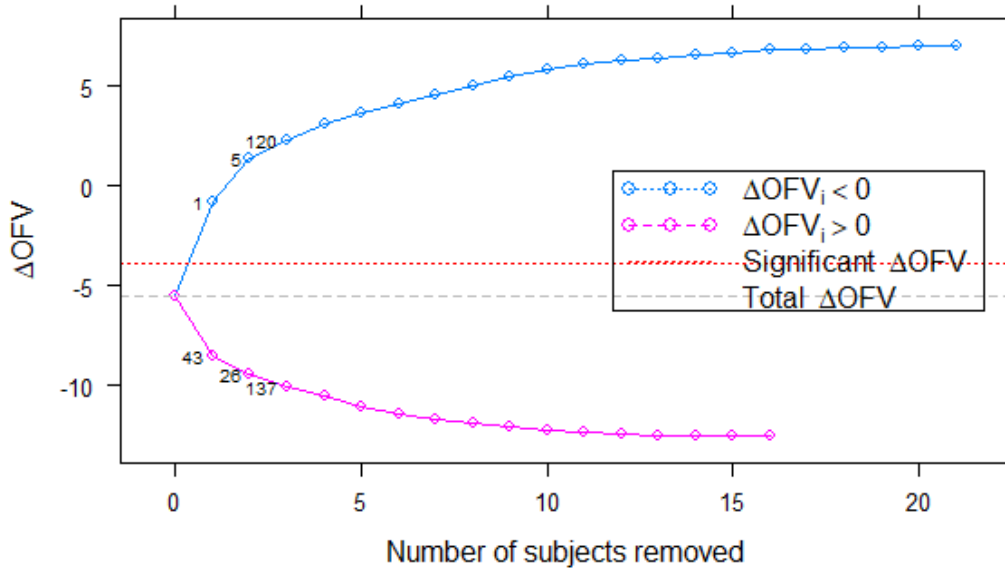

29

30

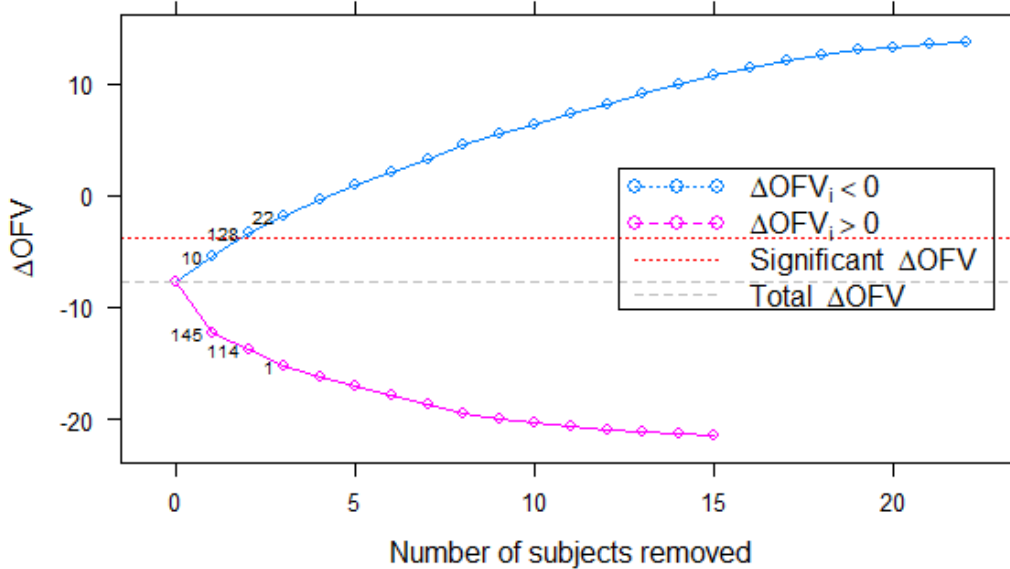

31

32 Each plot represents  $\Delta\text{OFV}$  (OFV with covariate [albumin or sex] - OFV without covariate) by removing  
 33 individuals. Blue or pink line represents runs with increased or decreased  $\Delta\text{OFV}$  by removing subjects.  
 34 Red line represents the significance threshold for  $\Delta\text{OFV}$  with  $P < 0.05$  and degree of freedom = 1.

35 Gray line represents  $\Delta$ OFV by using all data. Each number is ID of subject removed.  
36

37 **Figure S2. Goodness of Fit Plot of Final Model Stratified by Analyte and Age Group**

**GOF plot | Run 207, Ofv=10344.853**

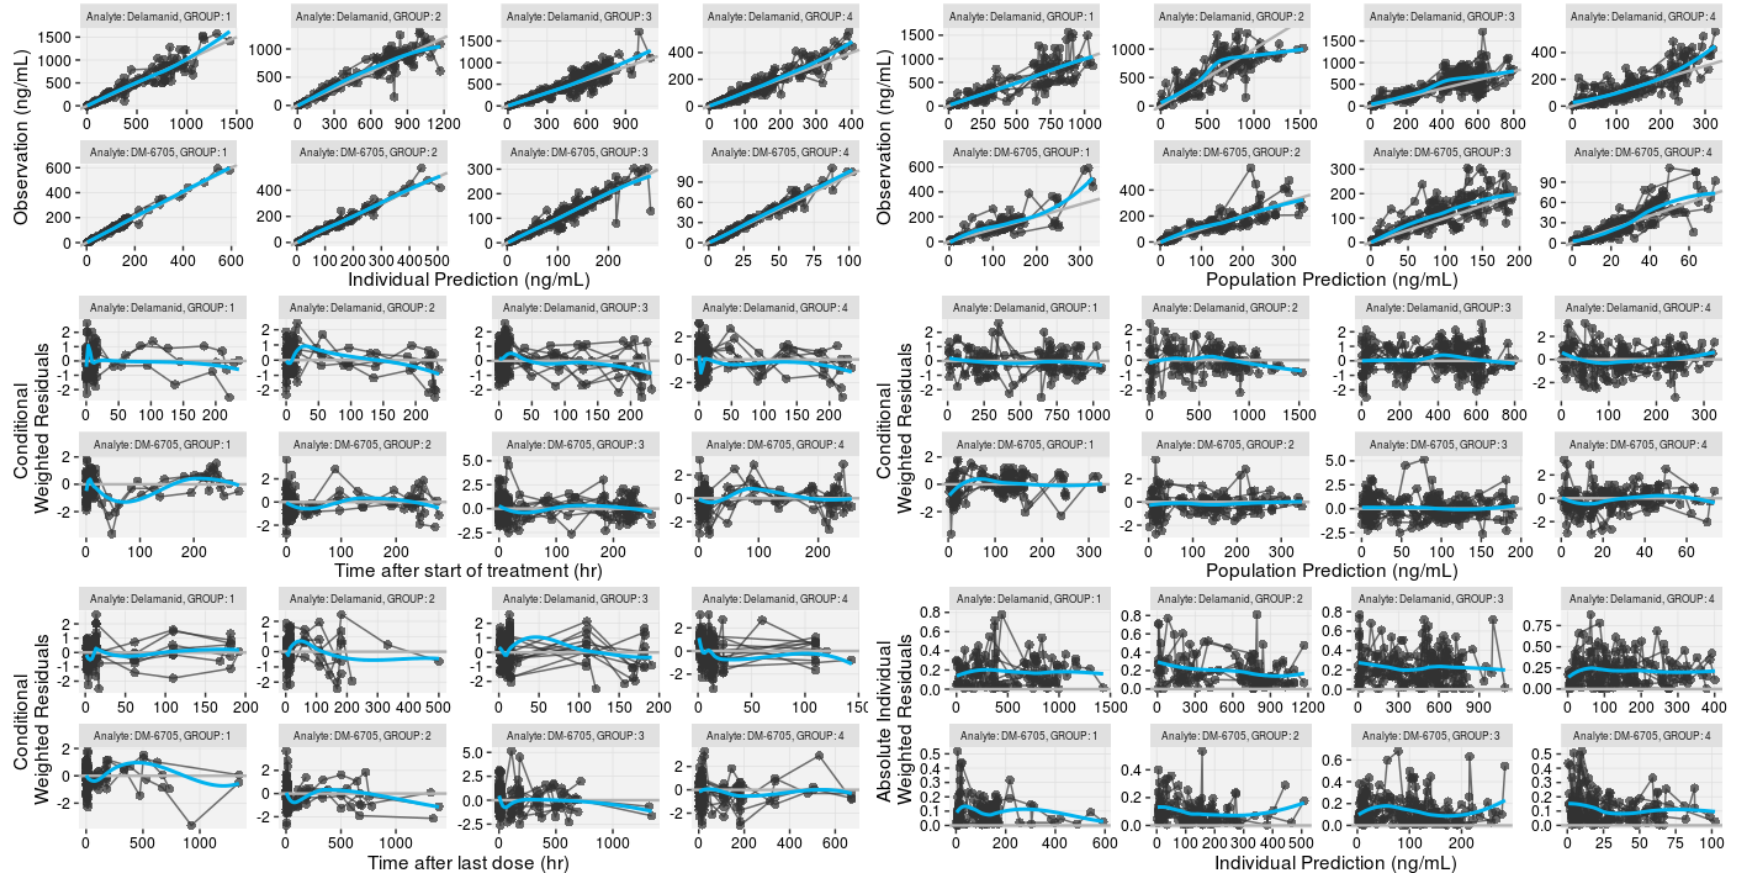

- 38
- 39 Black circle represents individual data. Connected line means data from same individual.  
 40 Gray line represents line of identity ( $y=x$ ) or  $y=0$ . Blue line shows smoothing line of data.  
 41 Group 1: ages 12 - 17 years, Group 2: ages 6 - 11 years, Group 3: ages 3 - 5 years, Group 4: ages birth - 2 years.  
 42

43 **Figure S3. Prediction-Corrected Visual Predictive Check Plots by Age Group and Analyte**

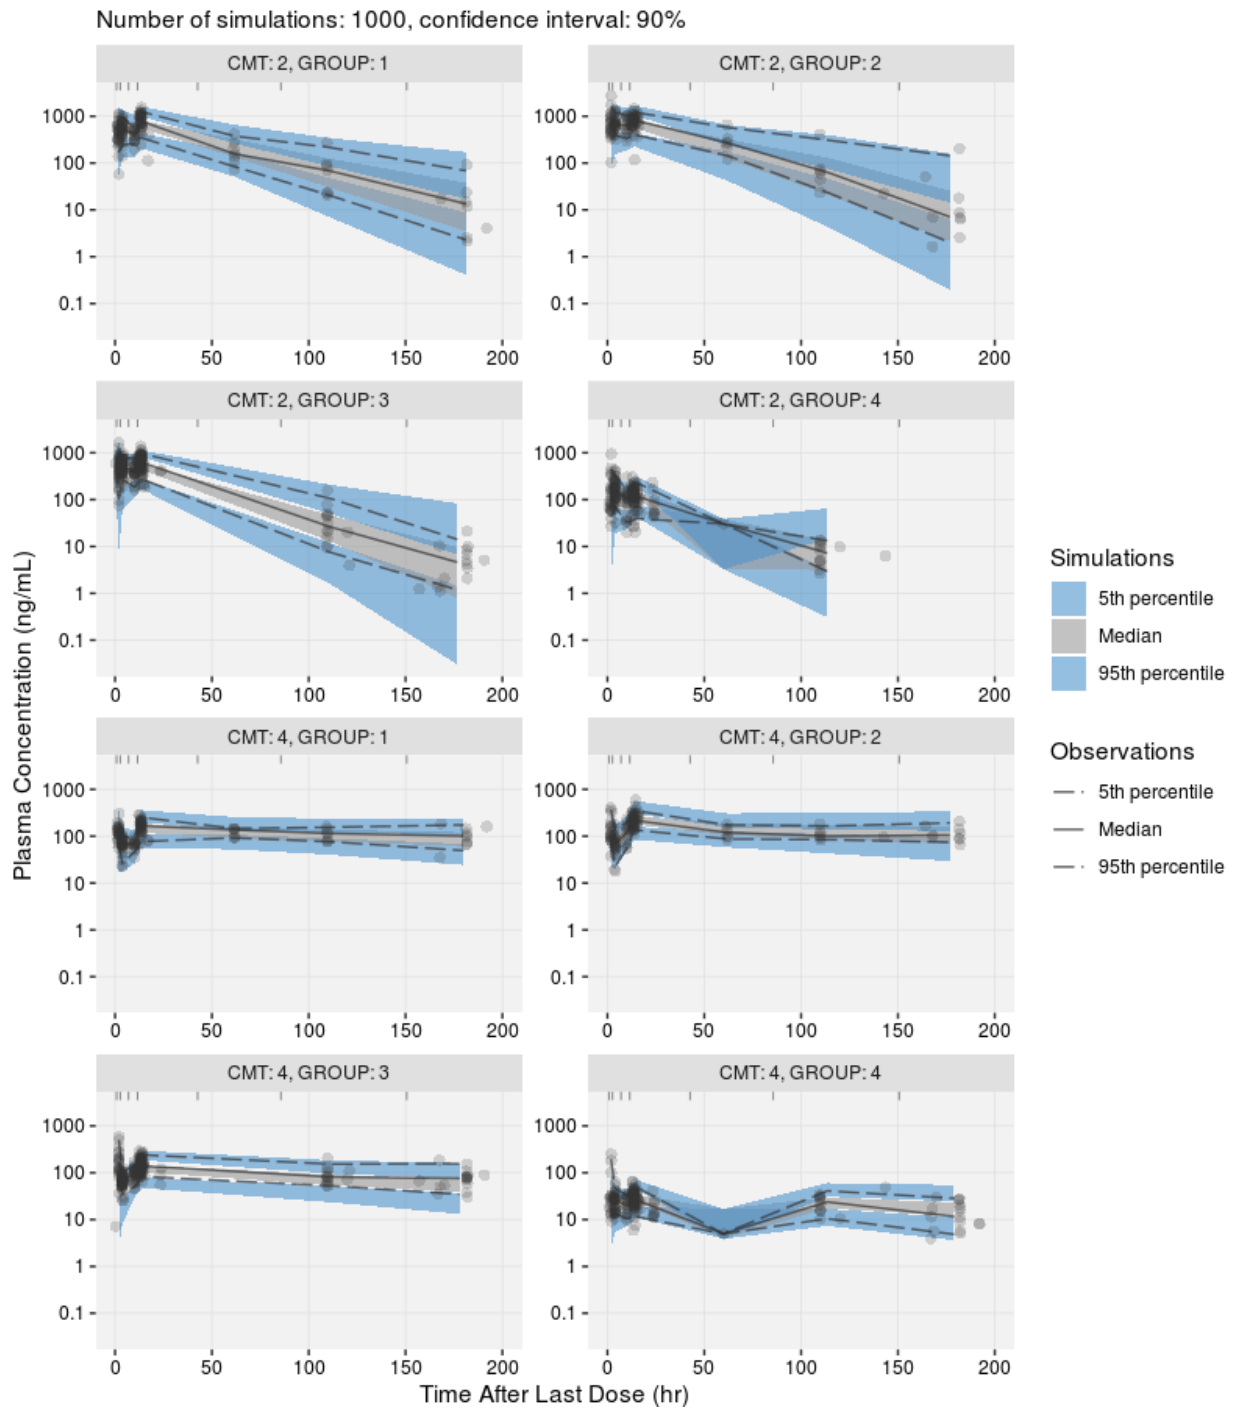

44

45 CMT: 2 represents delamanid and CMT: 4 represents DM-6705.

46 Group 1: ages 12 - 17 years, Group 2: ages 6 - 11 years, Group 3: ages 3 - 5 years, Group 4: ages birth - 2 years

47



48 **Figure S4. Distributions of QT Samples Stratified by Study**

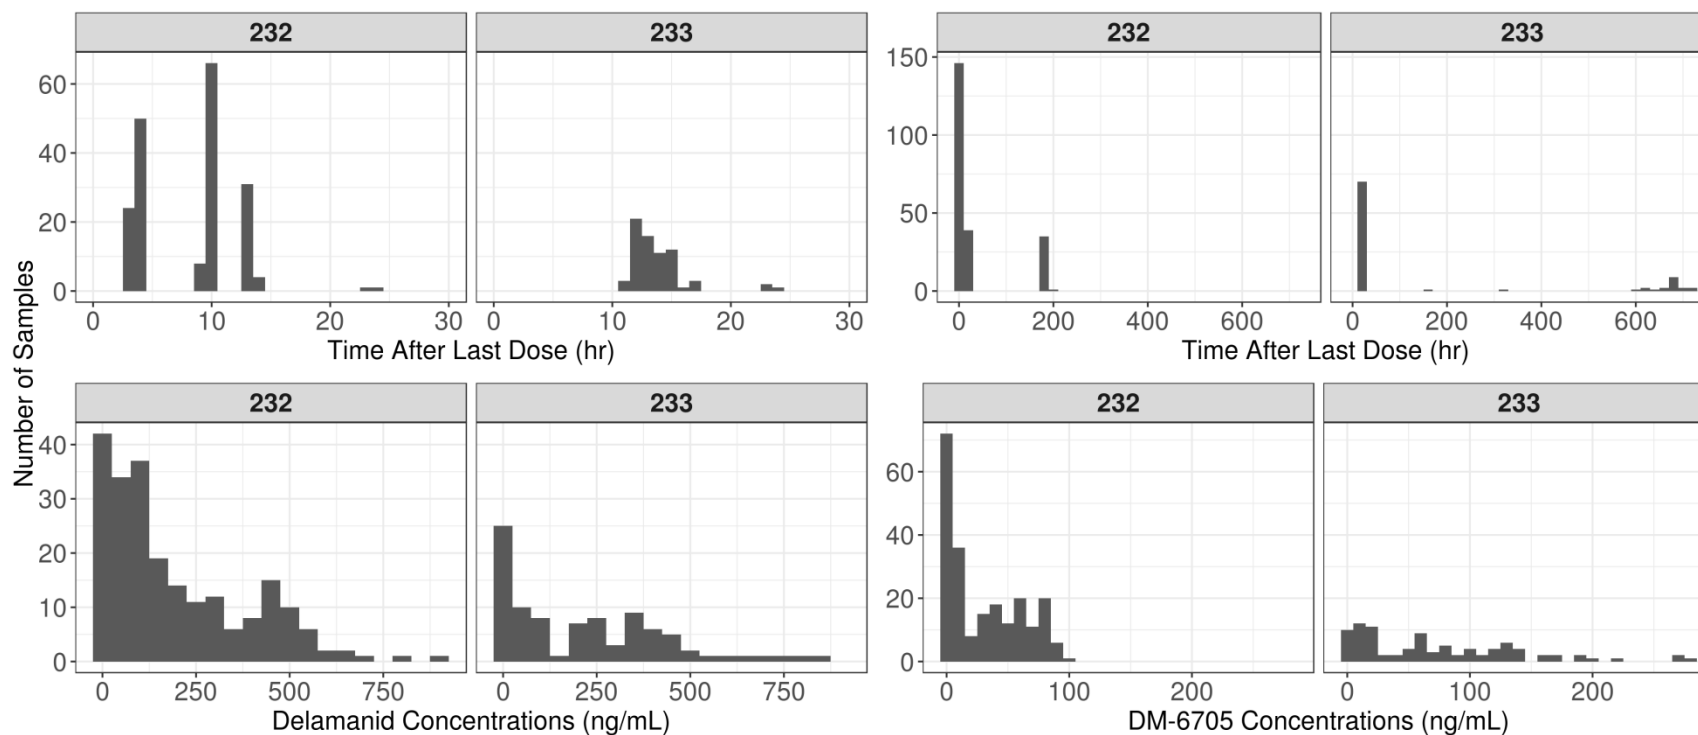

49  
50 Left top figure and right top figure are basically same figures, but zoomed in 30 hr after dose for left top one.  
51

52 **Figure S5 QT/QTc versus RR Plots**

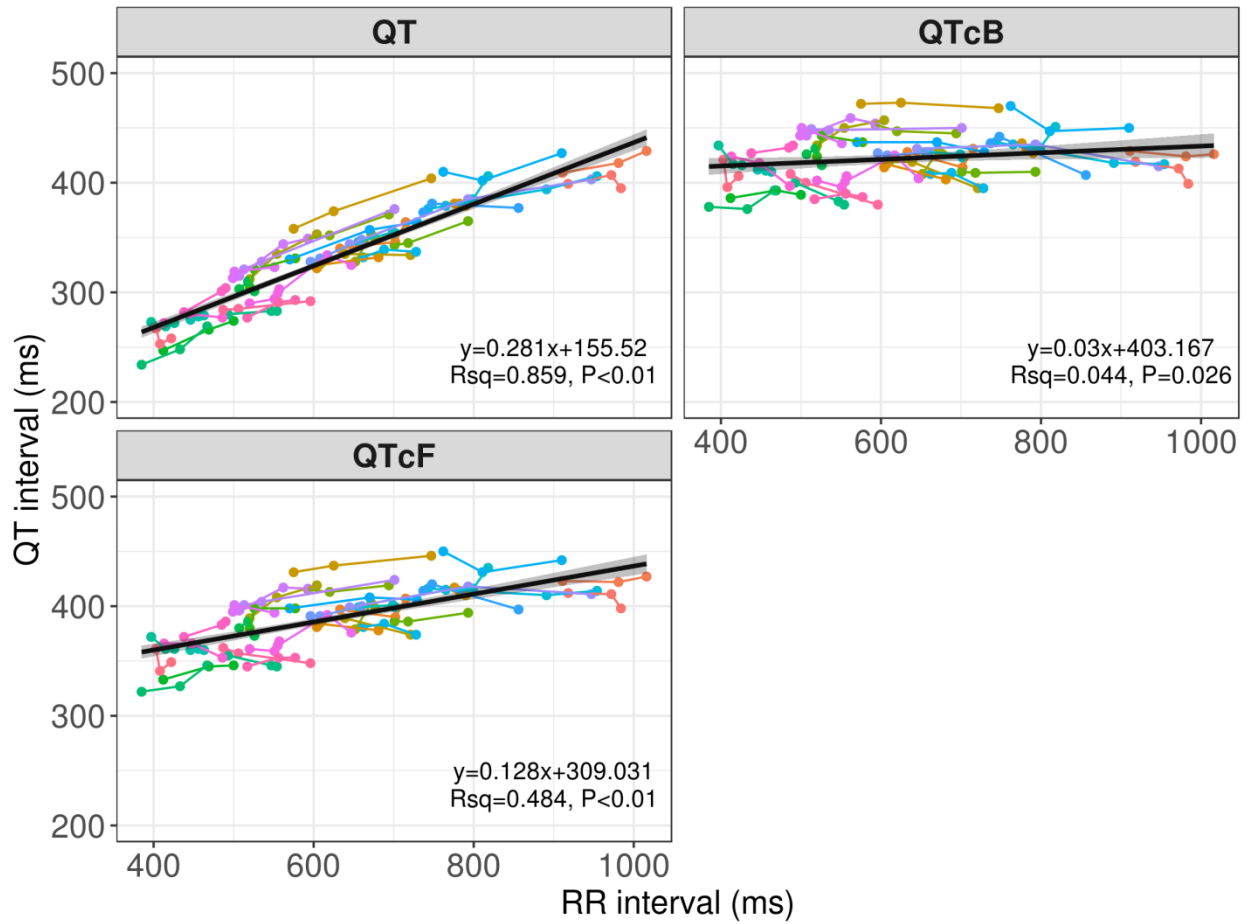

53

54 Closed circles represent observed data.

55 Each line represents data from one subject.

56 Black solid line with grey shaded area represent linear regression line with 90% CI.

57 Rsq: R squared.

58 **Figure S6 Hysteresis Plot: Mean  $\Delta$ QTcB versus Mean DM-6705 Concentration by Cmax Quantiles of Delamanid (Left)/DM-**  
 59 **6705 (Right) Stratified by Study Day**

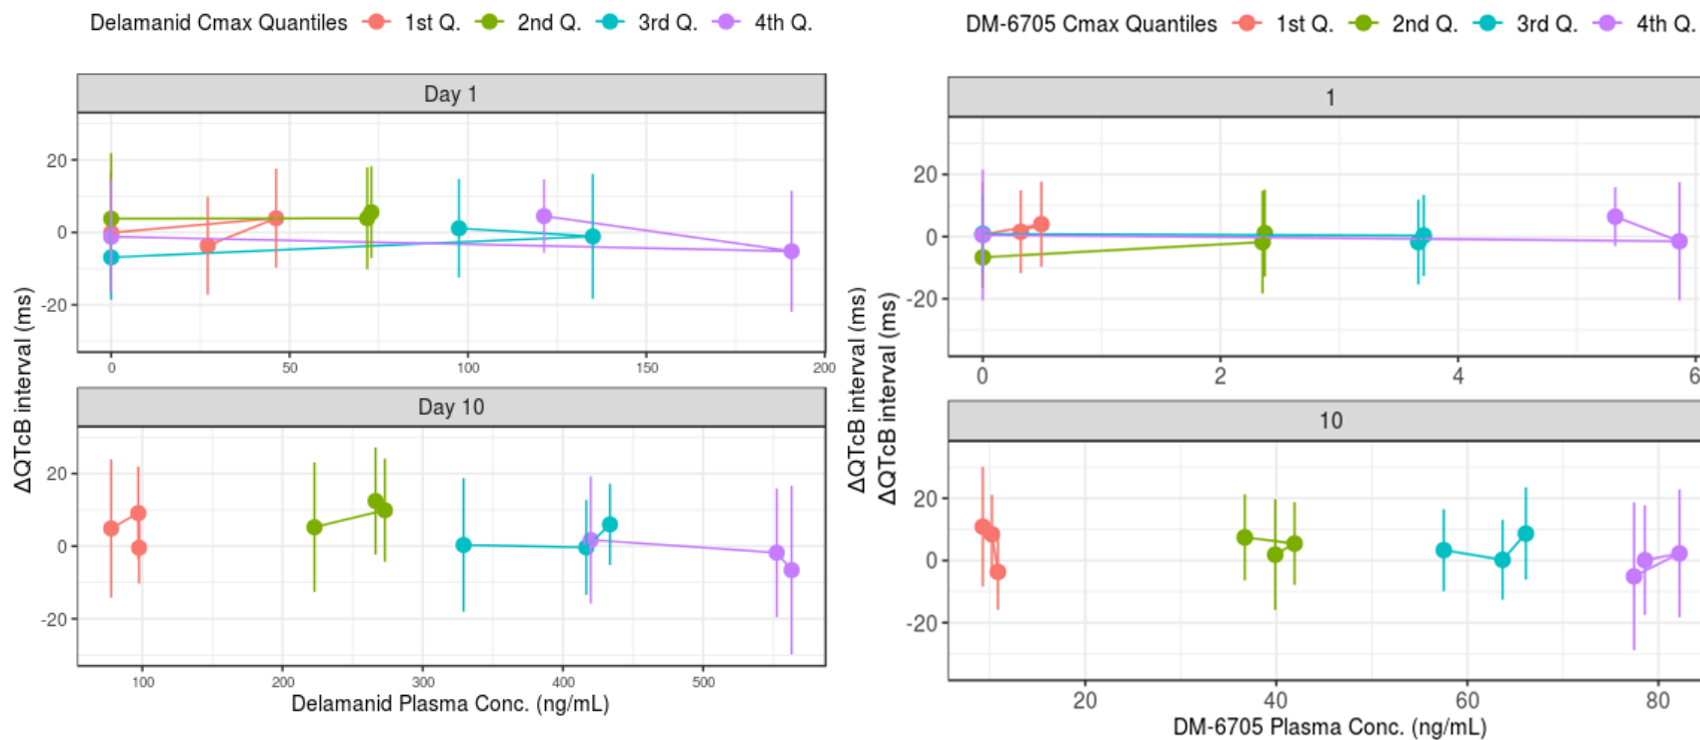

60

61 Data are shown as mean  $\pm$  SD.

62  $\Delta$ QTcB is baseline-corrected QTcB.

63 Q: quantile.

64

65 **Figure S7 Scatter Plot of  $\Delta$ QTcB vs Concentration**

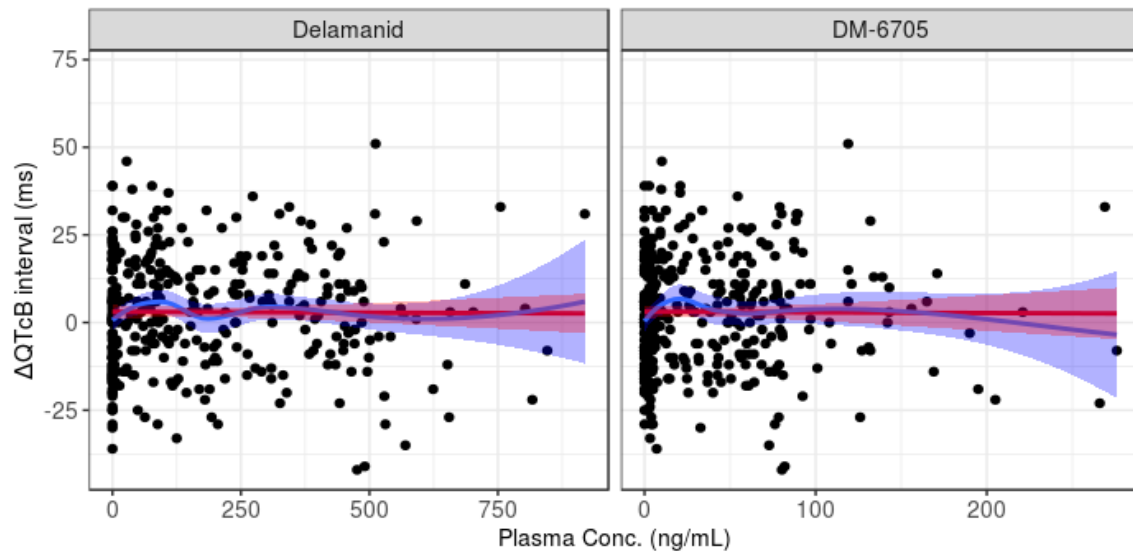

66

67 Closed circles represent observed values.

68 Red solid line and shaded area represent linear regression line and its 90% CI.

69 Blue solid line and shaded area represent loess smoothing curve and its SE.

70
